# Supplementary material for: Geographically structured genotypes and resistance clustering in Aspergillus fumigatus
Source: Research Square preprint supplement (doi:10.21203/rs.3.rs-7547800/v1), 2025-09-16
Supplement: Supplementary file 1 [file 82cda01ba11b6904c0f2856c.xlsx]

## Sheet: Sheet1
Strain	Sequence type	Genotype	Location	Collection	Date	Azole resistance
F637	1	2-5-3-5-3-5-2-6-4-3	Korea	Clinical	2022-04-18	Wild type
F628	2	3-5-3-5-3-6-2-6-4-3	Korea	Clinical	2022-03-21	Wild type
F485	3	5-2-3-7-1-6-2-6-4-3	Korea	Clinical	2021-09-07	Wild type
F527	4	5-2-3-7-1-6-2-7-1-3	Korea	Clinical	2021-10-26	Wild type
F286	5	5-3-3-7-1-4-2-9-2-3	Korea	Clinical	2020-11-24	Wild type
F371	6	5-4-3-5-3-4-2-8-6-3	Korea	Clinical	2021-04-30	Wild type
AF513	7	5-5-3-3-3-4-2-6-4-3	Korea	Environmental	2021-07-13	Wild type
F467	8	5-5-3-4-3-5-2-10-3-3	Korea	Clinical	2021-08-21	Wild type
AF577	9	5-5-3-5-3-6-2-8-4-3	Korea	Environmental	2021-09-07	Wild type
F367	10	5-6-3-5-3-4-4-2-4-3	Korea	Clinical	2021-04-29	Wild type
F647	11	6-14-3-7-1-5-2-14-2-3	Korea	Clinical	2022-04-22	Wild type
AF632	12	6-2-1-4-1-4-2-5-4-3	Korea	Environmental	2021-11-24	Wild type
AF433	13	6-2-2-7-1-6-2-4-1-3	Korea	Environmental	2021-04-27	Wild type
AF434	13	6-2-2-7-1-6-2-4-1-3	Korea	Environmental	2021-04-27	Wild type
AF614	14	6-2-3-5-1-4-2-2-3-3	Korea	Environmental	2021-11-02	Wild type
F668	15	6-2-3-5-3-6-2-8-3-3	Korea	Clinical	2022-06-13	Wild type
F273	16	6-2-3-7-1-5-2-6-1-3	Korea	Clinical	2020-10-22	Wild type
F342	16	6-2-3-7-1-5-2-6-1-3	Korea	Clinical	2021-03-16	Wild type
F376	17	6-2-3-7-1-5-2-6-3-3	Korea	Clinical	2021-05-10	Wild type
F491	18	6-2-3-7-1-6-2-6-4-3	Korea	Clinical	2021-09-22	Wild type
F458	19	6-2-3-7-1-6-2-7-1-3	Korea	Clinical	2021-08-14	Wild type
F427	20	6-2-4-5-3-5-5-8-3-3	Korea	Clinical	2021-07-12	Wild type
F590	21	6-3-3-5-2-4-2-6-3-3	Korea	Clinical	2021-12-23	Wild type
F217	22	6-3-3-5-2-4-2-6-4-3	Korea	Clinical	2020-08-03	Wild type
F237	23	6-3-3-5-2-4-6-6-3-3	Korea	Clinical	2020-08-31	Wild type
F517	24	6-3-3-5-2-5-2-6-3-3	Korea	Clinical	2021-10-08	Wild type
F212	25	6-3-3-5-3-5-2-7-3-4	Korea	Clinical	2020-07-23	Wild type
F213	25	6-3-3-5-3-5-2-7-3-4	Korea	Clinical	2020-07-24	Wild type
F610	25	6-3-3-5-3-5-2-7-3-4	Korea	Clinical	2022-02-09	Wild type
F516	26	6-3-3-7-2-6-2-6-3-3	Korea	Clinical	2021-10-04	Wild type
F234	27	6-3-3-7-2-6-2-7-3-3	Korea	Clinical	2020-08-23	Wild type
F598	28	6-3-3-7-3-4-2-6-2-3	Korea	Clinical	2022-01-17	Wild type
F305	29	6-3-4-7-1-4-2-6-3-3	Korea	Clinical	2021-01-01	Wild type
F563	30	6-3-4-7-1-4-3-6-3-3	Korea	Clinical	2021-11-09	Wild type
F323	31	6-4-3-5-3-4-3-11-4-3	Korea	Clinical	2021-01-25	Wild type
F256	32	6-4-3-5-3-4-3-6-2-3	Korea	Clinical	2020-10-05	Wild type
F317	33	6-4-3-5-3-5-2-6-3-3	Korea	Clinical	2021-01-14	Wild type
F421	34	6-4-3-7-1-5-2-6-4-3	Korea	Clinical	2021-07-01	Wild type
AF634	35	6-5-3-2-2-5-2-6-2-3	Korea	Environmental	2021-11-24	Wild type
F398	36	6-5-3-4-2-5-3-5-3-3	Korea	Clinical	2021-05-31	Wild type
F486	37	6-5-3-5-3-4-2-5-3-3	Korea	Clinical	2021-09-08	Wild type
F492	38	6-5-3-5-3-4-2-6-3-3	Korea	Clinical	2021-09-13	Wild type
F557	38	6-5-3-5-3-4-2-6-3-3	Korea	Clinical	2021-11-17	Wild type
F218	39	6-5-3-5-3-5-2-6-3-3	Korea	Clinical	2020-08-08	Wild type
F302	39	6-5-3-5-3-5-2-6-3-3	Korea	Clinical	2021-01-02	Wild type
AF626	40	6-5-3-5-3-5-2-7-1-3	Korea	Environmental	2021-11-24	Wild type
F407	41	6-5-3-5-3-5-3-6-3-3	Korea	Clinical	2021-05-05	Wild type
F493	41	6-5-3-5-3-5-3-6-3-3	Korea	Clinical	2021-09-13	Wild type
F660	42	6-5-3-5-3-5-5-10-3-3	Korea	Clinical	2022-05-21	Wild type
F673	43	6-5-3-5-3-6-2-6-3-3	Korea	Clinical	2022-06-17	Wild type
F567	44	6-5-3-7-1-5-3-6-2-3	Korea	Clinical	2021-11-24	Wild type
F219	45	6-5-3-7-1-6-3-6-2-3	Korea	Clinical	2020-08-08	Wild type
AF633	46	6-5-3-7-2-5-2-6-2-3	Korea	Environmental	2021-11-24	Wild type
F271	47	6-5-4-7-1-5-4-6-3-3	Korea	Clinical	2020-10-21	Wild type
F426	48	6-6-3-5-1-4-2-6-5-3	Korea	Clinical	2021-07-06	Wild type
F664	49	6-6-3-7-1-5-2-7-1-3	Korea	Clinical	2022-06-15	Wild type
F525	50	6-7-3-3-1-5-2-2-2-3	Korea	Clinical	2021-10-24	Wild type
F330	51	6-7-3-5-3-4-2-6-3-3	Korea	Clinical	2021-02-15	Wild type
F348	51	6-7-3-5-3-4-2-6-3-3	Korea	Clinical	2021-03-30	Wild type
F325	52	6-7-3-7-1-5-1-4-2-3	Korea	Clinical	2021-02-05	Wild type
F313	53	6-7-3-7-1-5-2-7-2-3	Korea	Clinical	2021-01-07	Wild type
AF501	54	6-9-3-7-1-5-1-6-2-3	Korea	Environmental	2021-07-05	Wild type
AF500	55	6-9-3-7-1-5-2-10-1-3	Korea	Environmental	2021-07-05	Wild type
F573	56	7-2-2-3-1-3-3-10-1-4	Korea	Clinical	2021-12-09	Wild type
F442	57	7-2-2-3-1-3-3-9-1-4	Korea	Clinical	2021-07-29	Wild type
AF406	58	7-2-3-7-1-5-3-5-3-3	Korea	Environmental	2021-03-25	Wild type
F240	59	7-2-4-7-1-5-2-7-1-3	Korea	Clinical	2020-08-31	Wild type
F275	60	7-3-3-3-3-4-3-8-2-3	Korea	Clinical	2020-11-03	Wild type
F287	60	7-3-3-3-3-4-3-8-2-3	Korea	Clinical	2020-11-25	Wild type
F619	61	7-3-3-4-2-6-3-10-5-3	Korea	Clinical	2022-02-28	Wild type
F513	62	7-3-3-4-3-6-2-8-4-3	Korea	Clinical	2021-10-04	Wild type
F332	63	7-3-3-7-1-4-2-10-3-3	Korea	Clinical	2021-02-25	Wild type
AF431	64	7-4-3-3-3-5-2-2-2-3	Korea	Environmental	2021-04-27	Wild type
AF617	64	7-4-3-3-3-5-2-2-2-3	Korea	Environmental	2021-11-02	Wild type
AF628	64	7-4-3-3-3-5-2-2-2-3	Korea	Environmental	2021-11-24	Wild type
AF630	64	7-4-3-3-3-5-2-2-2-3	Korea	Environmental	2021-11-24	Wild type
AF516	65	7-4-3-4-3-4-3-5-4-3	Korea	Environmental	2021-07-13	Wild type
F375	66	7-4-3-4-3-5-2-10-3-3	Korea	Clinical	2021-05-11	Wild type
AF463	67	7-4-3-5-2-5-2-8-3-3	Korea	Environmental	2021-05-25	Wild type
AF623	68	7-4-3-5-3-4-2-11-4-3	Korea	Environmental	2021-11-24	Wild type
AF615	69	7-4-3-5-3-4-2-2-2-3	Korea	Environmental	2022-02-17	Wild type
F613	69	7-4-3-5-3-4-2-2-2-3	Korea	Clinical	2021-11-02	Wild type
F334	70	7-4-3-5-3-4-3-11-4-3	Korea	Clinical	2021-03-14	Wild type
F478	70	7-4-3-5-3-4-3-11-4-3	Korea	Clinical	2021-09-02	Wild type
F638	70	7-4-3-5-3-4-3-11-4-3	Korea	Clinical	2022-04-16	Wild type
F368	71	7-4-3-5-3-5-4-12-3-3	Korea	Clinical	2021-04-09	Wild type
F542	72	7-5-3-4-2-4-3-10-3-3	Korea	Clinical	2021-11-01	Wild type
F560	73	7-5-3-4-3-4-2-8-3-3	Korea	Clinical	2021-11-17	Wild type
F494	74	7-5-3-5-3-4-2-2-3-3	Korea	Clinical	2021-09-18	Wild type
F654	75	7-5-4-5-2-4-2-18-4-3	Korea	Clinical	2022-05-03	Wild type
F584	76	7-5-4-5-2-4-2-7-4-4	Korea	Clinical	2021-12-21	Wild type
F394	77	7-7-3-3-3-4-2-10-4-3	Korea	Clinical	2021-05-25	Wild type
F215	78	7-7-3-3-3-4-3-10-3-3	Korea	Clinical	2020-07-24	Wild type
F466	79	7-7-3-5-2-4-3-6-3-3	Korea	Clinical	2021-08-21	Wild type
AF636	80	7-7-3-5-3-4-3-12-3-3	Korea	Environmental	2021-11-24	Wild type
AF579	81	8-2-3-5-1-4-2-11-3-3	Korea	Environmental	2021-09-07	Wild type
F630	82	8-2-3-5-3-4-3-6-4-3	Korea	Clinical	2022-03-25	Wild type
AF480	83	8-2-3-6-1-5-2-10-1-3	Korea	Environmental	2021-12-02	Wild type
F568	83	8-2-3-6-1-5-2-10-1-3	Korea	Clinical	2021-06-01	Wild type
AF479	84	8-2-3-6-1-5-2-8-3-3	Korea	Environmental	2021-06-01	Wild type
F366	85	8-2-3-6-3-4-3-4-4-3	Korea	Clinical	2021-04-28	Wild type
F228	86	8-2-4-8-2-4-2-6-3-3	Korea	Clinical	2020-08-12	Wild type
F592	87	8-3-3-4-2-6-3-10-6-3	Korea	Clinical	2021-12-31	Wild type
F607	87	8-3-3-4-2-6-3-10-6-3	Korea	Clinical	2022-01-24	Wild type
AF624	88	8-3-3-5-2-4-2-6-3-3	Korea	Environmental	2021-11-24	Wild type
AF625	88	8-3-3-5-2-4-2-6-3-3	Korea	Environmental	2021-11-24	Wild type
F229	89	8-3-3-5-3-5-2-10-3-3	Korea	Clinical	2020-08-19	Wild type
F526	90	8-3-3-7-1-7-3-10-3-3	Korea	Clinical	2021-10-25	Wild type
F333	91	8-4-4-5-3-5-3-7-4-3	Korea	Clinical	2021-03-09	Wild type
F291	92	8-5-3-3-3-5-2-8-3-3	Korea	Clinical	2020-12-07	Wild type
AF444	93	8-5-3-5-3-5-4-10-3-3	Korea	Environmental	2021-06-23	Wild type
AF639	93	8-5-3-5-3-5-4-10-3-3	Korea	Environmental	2021-05-04	Wild type
F413	93	8-5-3-5-3-5-4-10-3-3	Korea	Clinical	2021-12-14	Wild type
F608	94	8-5-4-5-3-4-4-9-4-3	Korea	Clinical	2022-02-09	Wild type
AF575	95	9-2-3-4-1-5-3-4-3-3	Korea	Environmental	2021-09-07	Wild type
F288	96	9-2-3-5-2-4-2-10-5-3	Korea	Clinical	2020-11-23	Wild type
F292	97	9-3-3-4-3-4-6-4-4-4	Korea	Clinical	2020-12-02	Wild type
F439	98	9-3-3-5-3-4-3-10-4-3	Korea	Clinical	2021-07-19	Wild type
F520	99	9-3-3-5-3-4-3-9-4-2	Korea	Clinical	2021-10-15	Wild type
F602	100	10-2-2-5-3-4-6-11-3-3	Korea	Clinical	2022-01-26	Wild type
F545	101	10-2-3-5-1-4-2-11-3-3	Korea	Clinical	2021-11-04	Wild type
F214	102	10-2-3-5-1-4-2-4-4-2	Korea	Clinical	2020-07-24	TR34
F370	103	10-2-3-5-2-4-2-11-5-3	Korea	Clinical	2021-04-29	Wild type
F377	103	10-2-3-5-2-4-2-11-5-3	Korea	Clinical	2021-05-10	Wild type
F327	104	10-2-3-5-2-4-6-11-3-3	Korea	Clinical	2021-02-08	Wild type
F617	105	10-2-3-5-2-4-6-9-5-3	Korea	Clinical	2022-02-23	Wild type
F623	106	10-2-3-5-2-5-3-11-7-3	Korea	Clinical	2022-03-08	TR34
F283	107	10-2-3-5-3-4-7-11-5-3	Korea	Clinical	2020-11-19	Wild type
AF526	108	10-2-3-6-3-5-2-10-4-0	Korea	Environmental	2021-07-24	Wild type
F669	109	10-2-3-7-3-4-2-8-3-3	Korea	Clinical	2022-06-28	TR46
F384	110	10-2-4-5-2-4-2-8-3-4	Korea	Clinical	2021-05-09	Wild type
F312	111	10-2-5-3-3-4-2-6-4-3	Korea	Clinical	2021-01-08	Wild type
F631	112	10-2-5-6-1-4-2-11-3-2	Korea	Clinical	2022-03-29	Wild type
F677	113	10-3-3-4-1-6-2-8-2-3	Korea	Clinical	2022-06-15	Wild type
F672	114	10-3-3-5-1-4-2-8-2-3	Korea	Clinical	2022-06-20	Wild type
F230	115	10-4-3-4-3-4-3-5-3-3	Korea	Clinical	2020-08-26	Wild type
F361	116	10-4-3-5-2-4-4-5-3-3	Korea	Clinical	2021-04-16	Wild type
F430	117	10-4-3-5-2-5-4-11-3-3	Korea	Clinical	2021-07-15	TR34
F440	118	10-4-3-5-3-4-2-10-3-3	Korea	Clinical	2021-07-21	Wild type
AF631	119	10-4-3-5-3-4-2-6-2-3	Korea	Environmental	2021-11-24	Wild type
F316	120	10-4-4-5-3-4-3-8-3-3	Korea	Clinical	2021-01-11	Wild type
F624	121	10-5-3-4-1-5-3-6-2-3	Korea	Clinical	2022-03-12	Wild type
F389	122	10-5-3-5-3-6-3-6-2-3	Korea	Clinical	2021-05-20	Wild type
F461	123	10-6-3-7-3-4-2-7-3-3	Korea	Clinical	2021-08-16	TR46
F501	124	10-7-3-3-1-4-2-7-4-4	Korea	Clinical	2021-09-15	Wild type
F253	125	10-7-3-3-1-5-3-5-2-3	Korea	Clinical	2020-10-05	Wild type
F282	125	10-7-3-3-1-5-3-5-2-3	Korea	Clinical	2020-11-19	Wild type
F456	125	10-7-3-3-1-5-3-5-2-3	Korea	Clinical	2021-08-11	Wild type
F468	125	10-7-3-3-1-5-3-5-2-3	Korea	Clinical	2021-08-22	Wild type
F420	126	10-7-3-3-2-4-3-5-2-3	Korea	Clinical	2021-07-08	Wild type
AF641	127	10-7-3-3-3-5-3-11-4-3	Korea	Environmental	2021-12-14	Wild type
F296	128	11-2-5-5-1-4-3-12-4-3	Korea	Clinical	2020-12-18	TR34
F649	129	11-3-3-5-2-4-2-12-1-3	Korea	Clinical	2022-04-25	Wild type
F663	130	11-3-4-5-2-4-2-10-1-3	Korea	Clinical	2022-05-26	Wild type
F671	131	11-5-3-5-3-4-3-14-3-3	Korea	Clinical	2022-06-30	Wild type
NRZ-2017-381	132	10-2-3-6-1-3-2-9-2-1	Germany	Clinical	2017-01-01	TR34
NRZ-2017-214	133	8-2-3-3-3-3-2-10-3-2	Germany	Clinical	2017-01-01	TR46
D-2-25L-3	134	9-2-3-5-1-4-3-6-1-1	Germany	Environmental	2016-04-12	Wild type
E-1-20-2	134	12-4-3-5-3-3-3-5-3-1	Germany	Environmental	2016-05-24	Wild type
L-3-15-2	134	7-5-3-5-3-5-2-9-4-2	Germany	Environmental	2016-04-08	Wild type
HMR AF 706	135	8-7-3-5-3-4-4-6-2-2	Canada	Clinical	2007-09-20	Wild type
IF1SW-F4	136	8-4-4-5-3-4-3-5-3-2	Space	Environmental	2015-03-01	Wild type
E-1-35-1	137	8-4-3-5-1-4-3-6-3-2	Germany	Environmental	2016-04-12	Wild type
F1903	138	8-7-3-5-1-5-3-6-1-2	China	Clinical	2019	Wild type
F2701	138	8-2-3-7-1-4-2-6-3-2	China	Clinical	2019	Wild type
M1650	138	8-2-2-3-1-4-2-7-3-2	China	Clinical	2019	Wild type
M40-03A	138	8-2-3-7-1-4-2-6-1-2	China	Clinical	2019	Wild type
PB30-11	138	7-5-3-5-3-5-2-9-4-2	China	Clinical	2019	Wild type
PF1904	138	7-5-3-5-3-5-2-9-4-2	China	Clinical	2019	Wild type
PF3501	138	7-5-3-5-3-5-2-9-4-2	China	Clinical	2019	Wild type
PG3602	138	7-5-3-5-3-5-2-9-4-2	China	Clinical	2019	Wild type
PH1799	138	7-5-3-5-3-5-2-9-4-2	China	Clinical	2019	Wild type
PK1002	138	7-5-3-5-3-5-2-9-4-2	China	Clinical	2019	Wild type
PM1702	138	8-5-3-5-3-4-2-7-3-2	China	Clinical	2019	Wild type
PM1903	138	7-5-3-5-3-5-2-9-4-2	China	Clinical	2019	Wild type
PM1906	138	7-5-3-7-1-5-2-9-4-2	China	Clinical	2019	Wild type
PT30-03	138	8-3-3-6-1-3-2-9-3-2	China	Clinical	2019	Wild type
PT4101	138	7-5-4-4-4-5-2-9-4-2	China	Clinical	2019	Wild type
PT4102	138	8-3-3-5-3-3-2-9-3-2	China	Clinical	2019	Wild type
PT4105	138	8-3-3-5-3-4-2-5-4-2	China	Clinical	2019	Wild type
PYS2101	138	7-5-3-5-3-5-2-9-4-2	China	Clinical	2019	Wild type
R1907	138	7-5-2-3-1-5-2-9-4-2	China	Clinical	2019	Wild type
R2805	138	7-5-3-5-3-5-3-6-4-3	China	Clinical	2019	Wild type
R2806	138	7-5-3-5-3-5-3-6-4-3	China	Clinical	2019	Wild type
R4201	138	7-5-3-5-3-5-3-6-4-3	China	Clinical	2019	Wild type
S3811D	138	7-5-3-5-3-5-3-6-4-3	China	Clinical	2019	Wild type
X1902	138	7-5-3-5-3-5-3-6-4-3	China	Clinical	2019	Wild type
Y1703	138	7-5-3-5-3-5-3-6-4-3	China	Clinical	2019	Wild type
Y3805	138	7-5-3-5-3-5-3-6-4-3	China	Clinical	2019	Wild type
NRZ-2017-534	139	9-4-3-5-3-3-2-5-2-2	Germany	Clinical	2017-01-01	Wild type
C-1-72L-1	140	9-3-3-5-2-3-2-6-4-2	Germany	Environmental	2016-07-05	Wild type
D-2-23L-5	141	11-2-4-5-3-5-3-9-3-2	Germany	Environmental	2016-04-08	Wild type
0040676010 AFU 30/06	142	8-5-3-5-1-4-2-6-1-2	France	Clinical	2020-04-15	Wild type
C-1-30L-1	142	8-2-3-5-1-4-2-6-3-2	Germany	Environmental	2017-01-01	Wild type
NRZ-2017-039	142	8-4-2-3-1-4-2-6-3-2	Germany	Clinical	2016-04-08	Wild type
A-2-35L-1	143	8-5-3-5-1-5-3-6-4-2	Germany	Environmental	2016-04-08	Wild type
A-2-44L-2	143	8-4-3-7-1-4-3-6-3-2	Germany	Environmental	2017-05-20	Wild type
C-1-40L-2	143	8-2-4-6-1-3-2-7-3-2	Germany	Environmental	2016-04-08	Wild type
C-1-40s-1	143	11-2-3-5-3-3-3-5-3-2	Germany	Environmental	2016-07-13	Wild type
H-1-29-2	143	12-2-4-5-3-3-2-5-3-1	Germany	Environmental	2016-07-13	Wild type
D-2-25L-2	144	8-5-3-7-1-4-2-6-1-2	Germany	Environmental	2016-04-08	Wild type
A-3-30s-2	145	9-2-2-3-1-2-0-9-1-2	Germany	Environmental	2016-07-13	Wild type
C-1-34s-1	146	8-7-3-7-1-4-2-7-2-2	Germany	Environmental	2016-04-08	Wild type
B-1-66L-1	147	8-2-3-7-1-3-3-6-3-2	Germany	Environmental	2016-04-08	Wild type
C-1-33L-1	147	8-2-4-5-3-4-3-6-3-2	Germany	Clinical	2018-01-01	Wild type
D-2-44L-1	147	12-2-5-5-2-3-2-5-3-2	Germany	Environmental	2016-07-05	Wild type
NRZ-2018-097	147	8-7-3-5-3-5-3-6-3-2	Germany	Clinical	2016-07-04	Wild type
NRZ-2017-508	148	8-2-3-5-3-4-2-6-3-2	Germany	Clinical	2017-01-01	Wild type
C-1-31L-1	149	8-5-3-6-1-4-2-6-3-2	Germany	Clinical	2016-04-08	Wild type
H-1-30-2	149	8-4-3-6-1-4-3-6-3-2	Germany	Environmental	2017-05-20	Wild type
47-04	150	8-5-3-5-3-4-2-6-2-2	United Kingdom	Clinical	2022	Wild type
Af10	150	9-6-2-6-1-3-2-6-2-2	USA	Clinical	1986	Wild type
D-2-15L-2	151	8-3-3-6-1-4-2-7-3-2	Germany	Environmental	2016-04-08	Wild type
NRZ-2018-529	152	7-5-3-5-3-5-2-9-4-2	Germany	Clinical	2018-01-01	TR34
F-1-39-1	153	8-2-3-5-3-4-3-7-3-2	Germany	Environmental	2016-04-27	Wild type
G-2-3-1	154	8-5-4-5-2-4-3-6-2-3	Germany	Environmental	2016-05-18	Wild type
NRZ-2017-362	155	8-6-3-3-3-3-2-6-3-2	Germany	Clinical	2017-01-01	TR34
B-1-70s-1	156	11-2-4-6-1-4-2-5-3-2	Germany	Environmental	2016-07-04	Wild type
B-1-71L-1	156	9-6-3-6-1-4-2-6-2-2	Germany	Environmental	2016-07-04	Wild type
G-2-5-2	157	8-2-3-5-1-4-2-6-3-2	Germany	Environmental	2016-05-18	Wild type
L-2-13-4	158	8-5-3-5-1-4-2-5-1-2	Germany	Environmental	2016-05-24	Wild type
E-1-14-1	159	8-2-3-6-1-4-2-6-1-2	Germany	Environmental	2016-04-12	Wild type
CAPA B	160	11-2-3-4-3-3-2-9-3-1	Germany	Clinical	2020	Wild type
E-1-56s-1	160	11-2-5-5-4-3-3-5-3-2	Germany	Clinical	2016-07-13	Wild type
D-2-49L-5	161	8-5-3-5-1-4-2-6-3-2	Germany	Environmental	2016-07-05	Wild type
070 01-70-BAL-1	162	8-4-3-6-1-4-2-6-3-2	Austria	Clinical	2021-03-29	Wild type
B-1-45-2	162	8-4-3-6-1-4-3-6-3-2	Germany	Environmental	2016-01-01	Wild type
C-1-72s-2	162	9-3-3-5-2-3-2-6-4-2	Germany	Environmental	2018-01-01	Wild type
D-2-22s-1	162	8-4-3-6-1-4-3-6-1-2	Germany	Environmental	2017-05-20	Wild type
E-1-37L-2	162	8-5-3-5-1-5-3-6-4-2	Germany	Environmental	2017-05-20	Wild type
F-1-3L-1	162	8-2-3-7-1-4-2-6-1-2	Germany	Environmental	2016-05-24	Wild type
H-1-15-2	162	10-2-3-5-3-3-2-5-3-1	Germany	Environmental	2016-04-27	Wild type
H-1-23-3	162	10-2-2-3-1-2-0-7-1-2	Germany	Environmental	2016-04-08	Wild type
L-3-24-1	162	12-4-3-5-3-0-2-11-3-1	Germany	Environmental	2016-04-04	Wild type
NRZ-2016-108	162	8-2-3-6-1-4-3-9-3-2	Germany	Clinical	2016-04-12	Wild type
NRZ-2018-286	162	8-4-3-5-3-4-2-2-2-2	Germany	Clinical	2016-07-05	Wild type
NRZ-2016-342	163	12-2-3-7-2-3-3-5-3-2	Germany	Clinical	2016-01-01	Wild type
A-3-45L-2	164	12-2-3-5-3-3-2-6-3-2	Germany	Environmental	2016-07-13	Wild type
B-1-44-s	165	8-2-3-5-1-4-3-9-3-2	Germany	Clinical	2016-04-04	Wild type
C-1-6s-3	166	12-5-2-5-3-3-3-6-3-2	Germany	Clinical	2016-04-08	Wild type
NRZ-2018-123	167	8-4-3-6-1-3-3-6-3-2	Germany	Clinical	2018-01-01	Wild type
C-1-60L-1	168	12-2-3-5-3-3-2-5-3-2	Germany	Clinical	2016-07-05	Wild type
D-2-43L-1	169	8-7-3-6-3-4-2-6-3-2	Germany	Environmental	2016-07-05	Wild type
D-2-43L-2	169	8-2-3-7-1-4-2-6-3-2	Germany	Clinical	2016-07-05	Wild type
G-2-1-2	170	12-7-3-5-3-0-2-5-3-1	Germany	Environmental	2017-01-01	Wild type
NRZ-2017-134	170	8-2-4-7-1-4-5-9-3-2	Germany	Clinical	2016-05-18	Wild type
C-1-66L-3	171	8-2-3-7-1-4-2-6-3-2	Germany	Environmental	2016-07-05	Wild type
B-1-46-5	172	11-2-4-5-3-4-2-5-5-2	Germany	Environmental	2016-04-04	Wild type
K-1-12L-1	173	11-2-3-5-3-4-2-5-3-2	Germany	Environmental	2016-05-03	Wild type
NRZ-2017-537	174	8-4-3-5-3-0-2-9-3-1	Germany	Clinical	2017-01-01	Wild type
C-1-94L-2	175	8-4-3-5-3-3-2-6-2-2	Germany	Environmental	2016-07-05	Wild type
A-2-27s-1	176	8-5-3-5-1-5-3-6-4-2	Germany	Environmental	2017-01-01	Wild type
A-2-48s-2	176	8-2-3-5-1-4-2-7-3-2	Germany	Environmental	2016-07-13	Wild type
B-1-75L-1	176	9-6-3-6-1-3-2-9-1-2	Germany	Environmental	2016-07-13	Wild type
NRZ-2017-096	176	12-2-3-3-3-0-2-6-5-2	Germany	Clinical	2016-07-04	Wild type
C-1-27s-1	177	11-2-3-6-3-3-2-5-2-1	Germany	Environmental	2016-04-08	Wild type
K-1-24L-1	178	12-2-3-6-1-4-3-3-3-3	Germany	Environmental	2016-05-03	Wild type
A-2-36s-3	179	8-5-3-5-1-5-3-6-4-2	Germany	Environmental	2016-04-08	Wild type
D-2-2s-2	179	11-2-4-5-3-4-3-5-3-2	Germany	Environmental	2016-07-13	Wild type
B-1-78L-1	180	8-7-3-7-3-4-2-6-3-2	Germany	Environmental	2016-07-04	Wild type
K-1-8L-3	181	8-7-3-6-1-4-2-7-2-2	Germany	Environmental	2016-05-03	Wild type
L-2-15-4	182	8-4-3-5-3-4-2-7-1-2	Germany	Environmental	2016-05-24	Wild type
B3604	183	8-2-3-5-1-4-2-6-1-2	China	Clinical	2019	Wild type
PA4301	183	7-5-3-5-3-5-2-9-4-2	China	Clinical	2019	Wild type
PB4205	183	7-5-3-5-3-5-2-9-4-2	China	Clinical	2019	Wild type
PF1804	183	7-5-3-5-3-5-2-9-4-2	China	Clinical	2019	Wild type
PM4304	183	7-5-3-5-3-5-2-9-4-2	China	Clinical	2019	Wild type
R4506	183	8-3-3-7-1-3-3-6-3-3	China	Clinical	2019	Wild type
PB4204	184	7-5-3-6-1-5-2-9-4-2	China	Clinical	2019	Wild type
PB4306	184	8-3-3-5-3-3-2-9-3-2	China	Clinical	2019	Wild type
S3901	184	8-3-3-7-1-3-3-7-3-3	China	Clinical	2019	Wild type
L-2-7-1	185	8-5-3-7-1-4-2-6-2-2	Germany	Environmental	2016-05-24	Wild type
NRZ-2017-101	186	8-3-3-5-1-3-3-10-3-2	Germany	Clinical	2017-01-01	Wild type
E-1-49-1	187	8-8-3-5-1-4-2-6-1-2	Germany	Environmental	2016-04-12	Wild type
D-2-47L-1	188	8-5-3-6-1-4-2-6-1-2	Germany	Clinical	2017-01-01	Wild type
NRZ-2017-322	188	8-2-5-5-3-4-3-9-3-2	Germany	Clinical	2017-01-01	Wild type
NRZ-2017-346	188	12-2-3-5-3-3-2-5-3-1	Germany	Clinical	2016-07-05	Wild type
47-10	189	8-5-3-5-3-4-2-6-2-2	New Zealand	Environmental	2022	Wild type
UTMN_AMR	190	8-3-4-4-2-4-3-2-4-3	Russia	Environmental	2020-08-01	Wild type
L-2-24-1	191	8-5-4-6-1-3-2-6-3-2	Germany	Environmental	2016-05-24	Wild type
K-1-18L-6	192	11-2-3-5-3-3-2-5-3-2	Germany	Environmental	2016-05-03	Wild type
L-2-9-5	193	8-3-2-3-1-4-2-7-3-2	Germany	Environmental	2016-05-24	Wild type
K-1-32s-1	194	8-2-3-5-4-4-2-6-2-2	Germany	Environmental	2016-05-03	Wild type
E-1-70L-4	195	9-2-2-3-1-2-0-9-1-2	Germany	Environmental	2016-07-13	Wild type
E-1-7-1	196	8-2-3-6-1-4-2-6-3-2	Germany	Environmental	2016-05-18	Wild type
G-2-14-1	196	11-3-3-3-3-3-2-7-2-1	Germany	Environmental	2016-04-12	Wild type
NRZ-2018-300	197	7-5-3-6-1-5-2-9-4-2	Germany	Clinical	2018-01-01	Wild type
CNM-CM8686	198	12-2-3-5-2-3-5-5-7-2	Spain	Clinical		Wild type
F1804	199	8-3-3-5-2-3-2-6-3-1	China	Clinical	2019	Wild type
PA1607	199	8-6-3-5-3-4-2-6-2-2	China	Clinical	2019	Wild type
R1620	199	7-5-4-5-2-5-2-9-4-2	China	Clinical	2019	Wild type
CAPA A	200	10-2-3-5-3-3-2-9-4-1	Germany	Clinical	2020	Wild type
NRZ-2017-283	200	8-5-4-5-3-3-4-9-3-1	Germany	Clinical	2017-01-01	Wild type
NRZ-2018-313	201	8-3-3-6-1-3-2-9-3-2	Germany	Clinical	2018-01-01	Wild type
0040679185 AFU 30/06	202	8-2-3-7-1-0-2-6-3-1	France	Clinical	2020-04-20	Wild type
NRZ-2018-396	203	8-3-3-5-3-3-2-9-3-2	Germany	Clinical	2018-01-01	Wild type
NRZ-2018-646	203	7-5-3-3-2-5-2-9-4-2	Germany	Clinical	2018-01-01	Wild type
A-2-49L-5	204	9-3-3-5-2-3-2-6-4-1	Germany	Environmental	2016-07-13	Wild type
D-2-2s-3	205	8-2-3-5-1-4-3-9-3-2	Germany	Environmental	2016-04-08	Wild type
A-2-47L-2	206	12-2-5-5-3-3-2-5-3-1	Germany	Environmental	2016-07-13	Wild type
A-2-47s-3	206	8-4-3-6-1-4-2-6-2-2	Germany	Environmental	2016-05-18	Wild type
B-1-66s-1	206	8-4-3-6-1-4-3-6-3-2	Germany	Environmental	2016-07-04	Wild type
B-1-73L-1	206	8-3-3-4-3-5-2-6-3-3	Germany	Environmental	2016-04-27	Wild type
F-1-14-1	206	8-4-3-5-3-0-5-6-3-1	Germany	Environmental	2016-07-13	Wild type
G-2-6-1	206	8-2-3-5-1-5-3-7-3-2	Germany	Environmental	2016-07-04	Wild type
I-1-32-1	206	8-6-3-5-1-4-2-6-1-2	Germany	Environmental	2016-05-20	Wild type
B-1-69L-1	207	8-3-3-6-1-3-2-9-3-2	Germany	Environmental	2016-07-04	Wild type
B-1-63s-1	208	8-2-3-7-1-3-3-6-3-2	Germany	Environmental	2016-07-04	Wild type
F-1-4L-1	209	8-7-4-6-1-5-2-6-3-2	Germany	Environmental	2016-04-27	Wild type
D-2-47L-2	210	10-2-3-5-3-3-4-9-4-1	Germany	Environmental	2016-07-05	Wild type
B-1-27-5	211	8-2-3-6-1-4-2-6-3-2	Germany	Environmental	2016-07-13	Wild type
E-1-74s-1	211	11-2-5-5-3-3-2-7-3-2	Germany	Environmental	2016-04-04	Wild type
K-1-3L-4	212	8-7-3-5-1-4-2-6-3-2	Germany	Environmental	2016-05-03	Wild type
5.1TA	213	10-4-3-6-1-4-2-6-1-2	Austria	Clinical	2020-04-23	Wild type
E-1-67s-1	213	8-4-3-7-1-4-3-6-3-2	Germany	Environmental	2016-07-13	Wild type
B-1-30-1	214	8-6-3-7-1-4-2-6-1-2	Germany	Environmental	2016-04-04	Wild type
L-2-11-4	215	8-5-3-5-1-4-3-6-2-3	Germany	Environmental	2016-05-24	Wild type
H237	216	12-7-3-5-3-0-2-5-3-1	United Kingdom	Clinical	2022	Wild type
C-1-90L-1	217	8-9-3-7-1-4-2-6-3-2	Germany	Environmental	2016-07-05	Wild type
NRZ-2018-307	218	8-3-3-6-1-3-2-5-3-2	Germany	Clinical	2018-01-01	Wild type
NRZ-2018-043	219	8-4-3-7-1-5-3-6-2-2	Germany	Clinical	2018-01-01	Wild type
R2404	220	10-3-3-5-4-3-3-9-3-1	China	Clinical	2019	Wild type
C-1-99L-2	221	8-5-3-5-3-3-2-6-3-2	Germany	Environmental	2016-07-05	Wild type
L-2-9-1	222	8-5-3-6-1-3-3-7-3-2	Germany	Environmental	2016-05-24	Wild type
E-1-46-2	223	8-4-3-5-3-0-2-6-3-1	Germany	Environmental	2016-04-12	Wild type
A-2-35s-1	224	8-2-3-5-1-4-2-6-3-2	Germany	Environmental	2016-07-13	Wild type
A-2-43L-2	224	8-4-3-6-1-4-3-6-3-2	Germany	Environmental	2016-07-13	Wild type
A-2-45L-5	224	8-3-3-3-3-3-3-6-3-1	Germany	Environmental	2016-07-13	Wild type
E-1-70L-5	224	8-2-3-5-3-4-2-9-3-2	Germany	Environmental	2016-07-13	Wild type
K-1-1L-5	225	11-2-4-5-2-3-3-2-3-2	Germany	Environmental	2016-05-03	Wild type
DX103-11A	226	8-3-3-6-2-3-2-6-3-3	China	Clinical	2023	Wild type
CEA10	227	11-2-2-5-3-3-2-5-3-2	France	Clinical	1989	Wild type
B-1-67L-1	228	8-3-3-3-3-3-3-6-3-1	Germany	Environmental	2016-07-04	Wild type
0030661546 AFU 25/06	229	8-5-3-5-3-3-2-5-3-2	France	Clinical	2020-03-23	Wild type
D-2-48L-1	229	7-2-4-7-1-4-2-7-2-2	Germany	Environmental	2016-07-05	Wild type
CNM-CM8689	230	9-2-3-6-1-4-2-6-2-2	Spain	Clinical		Wild type
Af293	231	8-4-3-6-2-3-2-6-3-3	USA	Clinical	1993	Wild type
NRZ-2017-115	232	10-4-3-5-2-4-3-9-2-1	Germany	Clinical	2017-01-01	Wild type
A-2-34L-2	233	8-4-3-5-1-4-2-6-1-2	Germany	Environmental	2016-07-13	Wild type
A1160	234	8-3-3-3-3-3-3-6-3-1	United Kingdom	Clinical	1993	Wild type
A1163	234	8-5-3-5-3-4-2-5-2-2	USA	Clinical		Wild type
D-2-26s-1	235	12-2-4-5-3-3-2-6-3-2	Germany	Environmental	2016-07-05	Wild type
D-2-49L-2	236	8-2-3-6-1-4-2-6-3-2	Germany	Environmental	2016-07-05	Wild type
D-2-38L-1	237	8-5-3-5-3-3-2-5-3-2	Germany	Clinical	2016-07-05	Wild type
E-1-25-10	237	9-3-3-5-2-3-2-7-4-2	Germany	Clinical	2016-04-12	Wild type
L-3-22-2	237	8-5-4-5-3-4-2-5-2-2	Germany	Environmental	2016-05-24	Wild type
L-3-21-1	238	10-2-4-6-1-2-0-7-1-2	Germany	Environmental	2016-01-01	Wild type
NRZ-2016-141	238	8-2-3-5-3-4-2-6-2-2	Germany	Clinical	2016-05-24	Wild type
H-1-26-1	239	8-6-3-6-1-4-2-6-2-2	Germany	Environmental	2016-05-24	Wild type
L-2-7-2	239	8-2-4-5-3-4-2-6-3-2	Germany	Environmental	2017-05-20	Wild type
L-3-24-3	240	12-2-3-6-1-3-3-10-3-2	Germany	Environmental	2016-05-24	Wild type
NRZ-2015-218	241	12-4-3-7-2-0-2-11-3-1	Germany	Clinical	2015-01-01	Wild type
B-1-32-1	242	8-2-4-6-1-3-2-10-3-2	Germany	Clinical	2016-04-04	Wild type
PH4002	243	8-4-3-3-3-4-2-2-2-2	China	Clinical	2019	Wild type
C-1-69s-1	244	8-6-3-6-1-4-2-6-1-2	Germany	Environmental	2016-05-03	Wild type
K-1-18L-3	244	11-2-5-5-4-4-2-5-3-2	Germany	Environmental	2016-07-05	Wild type
K-1-1L-2	245	8-3-4-5-3-0-2-9-3-1	Germany	Environmental	2018-01-01	Wild type
NRZ-2018-236	245	8-9-3-3-2-4-2-6-3-2	Germany	Clinical	2016-05-03	Wild type
NRZ-2016-071	246	8-5-3-5-3-3-5-6-3-2	Germany	Clinical	2016-01-01	Wild type
IP_23	247	10-4-2-3-1-4-3-9-3-2	France	Clinical		Wild type
IP_24	247	10-2-3-6-1-2-0-7-1-2	France	Clinical		Wild type
H-1-10-6	248	7-2-3-6-1-4-2-10-1-2	Germany	Environmental	2017-05-20	Wild type
I-1-2-4	249	11-3-4-7-1-3-3-10-4-2	Germany	Environmental	2016-05-20	Wild type
B-1-45-5	250	8-5-3-5-3-2-4-6-3-2	Germany	Environmental	2016-05-24	Wild type
C-1-77s-2	250	8-4-3-5-3-0-2-6-3-1	Germany	Environmental	2016-07-05	Wild type
L-3-13-1	250	12-4-3-5-3-4-2-9-2-1	Germany	Environmental	2016-04-04	Wild type
B-1-43-1	251	8-4-3-6-1-5-2-6-1-2	Germany	Clinical	2016-04-04	Wild type
H-1-1-2	252	11-2-3-5-3-3-3-5-3-2	Germany	Environmental	2017-05-20	Wild type
I-1-49-3	253	8-5-3-5-1-3-2-6-3-2	Germany	Environmental	2016-05-20	Wild type
D-2-29s-1	254	8-2-4-5-3-4-3-7-3-2	Germany	Clinical	2016-07-05	Wild type
L-2-4-3	255	8-7-3-6-1-5-2-6-3-2	Germany	Environmental	2016-05-24	Wild type
D-2-50s-1	256	12-2-4-5-3-3-2-5-3-2	Germany	Environmental	2016-07-05	Wild type
C-1-31s-1	257	12-2-2-3-1-2-0-7-1-2	Germany	Environmental	2016-04-08	Wild type
C-1-49-1	258	11-2-3-5-3-3-3-5-3-1	Germany	Environmental	2016-04-08	Wild type
L-2-16-3	258	12-3-3-6-1-0-2-9-3-1	Germany	Environmental	2016-05-24	Wild type
C-1-66L-2	259	8-4-3-3-2-4-2-6-2-2	Germany	Environmental	2017-01-01	Wild type
NRZ-2017-546	259	8-5-4-7-1-0-2-6-3-2	Germany	Clinical	2016-07-05	Wild type
C-1-28L-2	260	8-2-3-5-1-4-2-6-3-2	Germany	Environmental	2016-04-08	Wild type
D-2-15L-3	260	8-7-3-6-1-4-2-7-1-2	Germany	Environmental	2016-04-08	Wild type
G-2-9-2	261	11-2-3-5-3-3-2-6-3-2	Germany	Environmental	2016-05-18	Wild type
L-3-21-3	261	12-5-3-5-3-3-2-10-3-2	Germany	Environmental	2016-05-24	Wild type
NRZ-2018-326	262	8-3-3-5-3-3-2-9-3-2	Germany	Clinical	2018-01-01	Wild type
ISSFT-021	263	8-4-3-5-2-4-3-6-2-2	Space	Environmental	2015-03-01	Wild type
E-1-75s-1	264	8-4-3-6-1-5-2-6-1-3	Germany	Clinical	2016-07-13	Wild type
NRZ-2017-069	265	9-2-3-7-1-2-0-7-1-2	Germany	Clinical	2017-01-01	Wild type
CAPA C	266	8-2-3-5-3-2-3-9-3-2	Germany	Clinical	2018-01-01	Wild type
NRZ-2018-539	266	7-5-3-5-3-5-2-9-4-2	Germany	Clinical	1905-07-12	TR46
LMB-35Aa	267	8-2-3-7-2-4-2-6-3-2	Peru	Environmental	2005-10-10	Wild type
F-1-33L-2	268	10-2-2-3-1-2-0-7-1-2	Germany	Environmental	2016-04-27	Wild type
A-3-43s-1	269	8-2-3-5-2-5-2-6-3-2	Germany	Environmental	2016-07-13	Wild type
W72310	270	9-2-2-3-1-2--7-1-4	USA	Clinical	2014-03-09	Wild type
B-1-32-3	271	12-3-3-5-3-0-2-9-3-1	Germany	Environmental	2016-04-04	Wild type
L-2-17-1	271	8-6-3-6-1-4-2-6-1-2	Germany	Environmental	2016-05-24	Wild type
D-2-39L-1	272	8-5-3-7-1-4-2-6-4-2	Germany	Environmental	2016-07-05	Wild type
A-3-37s-1	273	8-2-3-6-1-5-2-6-3-2	Germany	Environmental	2016-07-13	Wild type
D-2-24s-1	274	9-2-4-5-1-4-2-7-3-2	Germany	Environmental	2016-04-08	Wild type
D-2-35s-1	275	8-4-3-6-1-5-2-7-1-2	Germany	Environmental	2016-07-05	Wild type
A-3-40L-1	276	12-2-4-5-3-3-2-5-3-2	Germany	Environmental	2016-07-05	Wild type
C-1-76s-2	276	8-5-3-5-1-3-2-6-2-2	Germany	Environmental	2016-07-13	Wild type
C-1-93L-3	276	11-2-5-5-3-3-2-10-7-2	Germany	Environmental	2016-07-05	Wild type
C-1-93s-1	276	12-6-3-7-3-3-2-7-3-2	Germany	Environmental	2016-07-05	Wild type
E-1-66s-1	277	10-4-3-5-3-4-2-9-3-2	Germany	Environmental	2016-07-13	Wild type
L-3-13-2	278	7-5-3-5-3-5-2-9-4-2	Germany	Environmental	2016-05-24	Wild type
L-2-16-1	279	12-6-3-5-3-0-2-5-3-1	Germany	Environmental	2016-05-24	Wild type
NRZ-2018-290	280	8-3-3-6-1-3-2-9-3-2	Germany	Clinical	2018-01-01	TR34
B-1-26-5	281	8-2-4-5-1-3-2-7-3-2	Germany	Environmental	2016-04-04	Wild type
C-1-80s-1	282	8-2-3-6-1-4-2-6-1-2	Germany	Environmental	2016-07-05	Wild type
C-1-28L-1	283	8-2-3-5-1-4-3-5-3-2	Germany	Environmental	2016-04-08	Wild type
C-1-24L-3	284	8-2-3-5-1-4-3-9-3-2	Germany	Environmental	2016-04-08	Wild type
0040673067 AFU 30/06	285	9-2-3-7-1-4-2-6-1-2	France	Clinical	2020-04-02	Wild type
0040668669 AFU 30/06	286	12-2-2-3-1-2-0-7-1-2	France	Clinical	1905-06-29	Wild type
0040675686 AFU 30/06	286	10-2-2-3-1-2-0-7-1-2	France	Clinical	2020-04-13	Wild type
C-1-51s-1	286	8-6-3-5-1-4-2-6-1-2	Germany	Environmental	2020-04-02	Wild type
G-2-22-4	286	8-2-3-6-1-4-2-6-3-2	Germany	Environmental	2017-01-01	Wild type
I-1-2-2	286	8-6-3-5-3-4-2-9-4-2	Germany	Environmental	2017-01-01	Wild type
I-1-22-4	286	8-6-3-5-3-4-2-9-4-2	Germany	Environmental	2016-05-18	Wild type
I-1-22-5	286	8-7-4-7-1-4-2-5-1-2	Germany	Environmental	2016-07-05	Wild type
K-1-3L-2	286	9-4-3-6-1-4-2-7-1-2	Germany	Environmental	2016-05-20	Wild type
niveus	286	10-2-3-5-3-2-0-7-1-2	Brazil	Environmental	2016-05-20	Wild type
NRZ-2017-040	286	8-3-3-7-2-3-2-9-3-3	Germany	Clinical	2016-05-20	Wild type
NRZ-2017-339	286	8-2-3-5-2-4-3-10-3-2	Germany	Clinical	2016-05-03	Wild type
I-1-19-2	287	7-2-3-6-1-5-2-7-1-2	Germany	Environmental	2016-05-20	Wild type
ATCC 13073	288	8-6-2-6-1-3-2-6-1-2	USA	Clinical	2022	Wild type
B5233	288	8-2-3-5-1-5-3-7-3-2	USA	Clinical	2022	Wild type
NRZ-2018-272	289	8-4-3-5-3-3-3-6-3-2	Germany	Clinical	2017-01-01	Wild type
CNM-CM8714	290	8-2-3-5-1-4-2-6-4-2	Spain	Clinical		TR34
E-1-33L-1	291	8-4-3-7-1-5-2-6-2-2	Germany	Environmental	2016-04-12	Wild type
NRZ-2018-649	292	7-5-3-5-3-5-2-9-4-2	Germany	Clinical	2018-01-01	Wild type
Z5	293	10-3-3-5-2-3-4-6-3-2	China	Environmental	2010-03-01	Wild type
SCHI0081.S.1	294	10-3-3-5-3-4--5-2-3	Australia	Clinical	2021-02-21	Wild type
NRZ-2017-434	295	12-4-3-7-1-0-2-6-3-1	Germany	Clinical	2017-01-01	Wild type
K-1-48s-1	296	9-2-3-5-3-4-3-5-3-2	Germany	Environmental	2016-05-23	Wild type
A-2-26s-2	297	8-2-3-5-1-4-2-6-3-2	Germany	Environmental	2016-07-13	Wild type
K-1-34L-1	298	8-3-3-5-1-3-4-6-3-3	Germany	Environmental	2016-05-03	Wild type
D-2-17L-1	299	8-3-3-5-1-4-2-6-1-2	Germany	Environmental	2016-07-05	Wild type
CNM-CM8812	300	11-2-2-3-1-2-0-7-1-2	Spain	Clinical		Wild type
C-1-64L-2	301	8-2-4-5-3-3-3-7-3-2	Germany	Environmental	2002-12-18	Wild type
D141	301	8-5-3-7-1-4-2-6-1-2	China	Clinical	1980	Wild type
HMR AF 270	301	12-7-3-5-3-0-2-5-3-1	Canada	Clinical	2016-07-05	Wild type
C-1-69L-1	302	9-3-3-5-2-3-2-6-4-2	Germany	Environmental	2016-07-05	Wild type
C-1-67s-1	303	12-3-3-5-3-0-2-9-3-1	Germany	Environmental	2016-01-01	TR34
I-1-12-1	303	12-2-3-5-3-3-3-5-3-1	Germany	Environmental	2016-05-20	TR34
NRZ-2016-121	303	12-4-4-6-1-0-2-11-3-1	Germany	Clinical	2016-07-05	TR34
K-1-4s-1	304	11-2-3-5-3-4-3-7-3-1	Germany	Environmental	2016-05-03	Wild type
K-1-4s-1_2	304	12-7-3-5-1-0-2-5-3-1	Germany	Environmental	2016-05-03	Wild type
L-2-21-2	305	9-3-2-3-1-4-2-7-5-2	Germany	Environmental	2016-05-24	Wild type
C-1-33L-2	306	11-2-3-5-3-3-2-5-3-2	Germany	Environmental	2016-04-08	Wild type
ATCC 46645	307	8-6-3-7-2-3-2-6-3-2	United Kingdom	Clinical	2022	Wild type
L-2-11-2	308	8-3-4-5-2-4-2-7-1-2	Germany	Environmental	2016-05-24	Wild type
B-1-68s-1	309	8-3-3-5-2-3-2-9-3-3	Germany	Environmental	2016-07-04	Wild type
D-2-43s-1	310	11-2-2-3-1-2-0-7-1-2	Germany	Environmental	2016-07-05	Wild type
D-2-32L-1	311	8-3-3-7-2-3-2-9-3-3	Germany	Environmental	2016-07-05	Wild type
E-1-75s-2	312	8-4-3-5-3-4-2-2-2-2	Germany	Environmental	2016-07-05	Wild type
C-1-24L-2	313	8-7-3-7-1-0-2-7-2-2	Germany	Environmental	2016-04-08	Wild type
F-1-42-2	314	8-4-3-7-1-4-3-6-3-2	Germany	Environmental	2016-04-27	Wild type
CAPA D	315	8-7-3-6-3-4-2-6-3-2	Germany	Clinical	2020	Wild type
K-1-8L-1	316	8-2-3-6-1-4-2-7-5-2	Germany	Environmental	2016-05-03	Wild type
H-1-21-9	317	10-2-2-3-1-2-0-7-1-2	Germany	Environmental	2017-05-20	Wild type
ATCC 42202	318	9-2-3-5-1-4-3-5-3-2	USA	Clinical	2016	Wild type
JCM 10253	318	10-4-3-5-3-0-3-5-3-2	Japan	Animal	2022	Wild type
AF210	319	8-4-3-6-1-5-3-6-1-2	United Kingdom	Clinical	2016-04-08	Wild type
C-1-6s-2	319	9-6-3-5-3-3-3-2-3-1	Germany	Environmental	1905-06-18	TR34
ICMP 23421	320	8-3-3-5-1-3-2-6-1-2	New Zealand	animal	2019-05-07	Wild type
I-1-25-1	321	8-2-3-5-1-3-2-7-3-2	Germany	Environmental	2016-05-20	Wild type
A-3-46s-1	322	8-5-3-5-3-3-5-6-4-2	Germany	Environmental	2016-07-13	TR34
D-2-39L-2	323	8-2-3-6-1-4-2-6-2-2	Germany	Environmental	2016-07-05	Wild type
NRZ-2016-063	324	8-3-4-5-3-0-2-6-3-3	Germany	Clinical	2016-01-01	Wild type
NRZ-2017-282	325	8-7-3-5-1-4-2-7-2-2	Germany	Clinical	2017-01-01	Wild type
E-1-21-2	326	12-5-3-4-2-3-2-6-3-2	Germany	Environmental	2016-04-12	Wild type
A-2-49L-2	327	9-2-3-5-3-3-2-6-1-3	Germany	Environmental	2018-01-01	Wild type
F-1-10L-1	327	7-5-3-5-3-5-2-9-4-2	Germany	Environmental	2016-04-27	Wild type
NRZ-2018-146	327	8-2-3-6-1-3-2-6-3-2	Germany	Clinical	2016-07-13	Wild type
08-19-02-30	328	8-2-3-6-1-5-2-6-2-2	Netherlands	Environmental	2016-05-24	Wild type
B-1-48-5	328	12-4-3-6-1-4-5-6-3-2	Germany	Environmental	2016-04-04	Wild type
C-1-76s-1	328	8-3-3-3-1-4-3-6-3-1	Germany	Environmental	2016-07-05	Wild type
L-3-11-2	328	12-4-3-5-2-4-2-9-2-1	Germany	Environmental	1905-06-30	Wild type
D-2-28L-1	329	8-2-4-5-3-4-3-7-3-2	Germany	Environmental	2016-07-05	Wild type
L-3-7-1	329	8-6-3-5-3-3-5-6-3-2	Germany	Environmental	2016-05-24	Wild type
NRZ-2018-281	330	10-3-3-6-1-3-2-10-3-1	Germany	Clinical	2018-01-01	Wild type
E-1-65L-2	331	12-2-5-5-3-3-2-5-3-1	Germany	Environmental	2016-07-13	Wild type
M.20.0011027	332	11-2-3-6-1-3-3-5-3-2	United Kingdom	Clinical	2020-10-01	Wild type
M.20.0011028	332	8-5-3-5-1-3-2-6-3-2	United Kingdom	Clinical	2020-10-01	Wild type
NRZ-2016-032	333	8-3-3-5-3-3-3-6-3-1	Germany	Clinical	2017-01-01	Wild type
NRZ-2017-076	333	8-3-3-5-3-3-2-9-3-3	Germany	Clinical	2017-01-01	Wild type
NRZ-2017-195	333	8-2-3-6-1-4-1-10-3-2	Germany	Clinical	2016-01-01	Wild type
SCHI0087.S.22	334	12-4-3-5-3-3--6-4-3	Australia	Clinical	2021-02-21	Wild type
E-1-65L-4	335	10-4-3-5-3-4-2-7-3-2	Germany	Environmental	2016-07-13	Wild type
0040676907 AFU 25/06	336	12-4-3-5-3-0-5-5-3-1	France	Clinical	2020-04-16	Wild type
NRZ-2014-065	337	8-9-3-3-3-3-3-9-3-2	Germany	Clinical	2014-01-01	TR46
L-3-11-1	338	9-2-3-5-2-2-0-7-1-2	Germany	Environmental	2016-05-24	Wild type
CNM-CM8057	339	8-2-3-6-1-4-2-6-3-2	Spain	Clinical		TR46
H-1-21-5	340	10-2-2-3-1-2-0-7-1-2	Germany	Environmental	2017-05-20	Wild type
I-1-32-2	340	8-4-3-5-2-4-2-6-1-2	Germany	Environmental	2016-05-24	Wild type
I-1-48-3	340	8-6-3-5-2-3-2-6-3-2	Germany	Environmental	2016-05-20	Wild type
L-2-22-4	340	11-2-3-6-2-2-0-7-1-2	Germany	Environmental	2016-05-20	Wild type
E-1-48-2	341	8-4-3-6-1-5-3-6-1-2	Germany	Environmental	2016-04-12	TR34
F-1-13L-1	342	7-5-3-5-3-5-2-9-4-2	Germany	Environmental	2016-05-03	Wild type
F-1-13L-3	343	8-2-4-5-3-4-3-9-3-2	Germany	Environmental	2016-05-03	Wild type
