# Supplementary material for: Geographically structured genotypes and resistance clustering in Aspergillus fumigatus
Source: Research Square preprint supplement (doi:10.21203/rs.3.rs-7547800/v1), 2025-09-16
Supplement: Supplementary file 1 [file e42650258175eb6d94cd4192.pdf]

## **Supplementary material**

### **Brief Reports**

#### **Geographically structured genotypes and resistance clustering in *Aspergillus fumigatus***

Won-Bok Kim, Dukhee Nho, Sung-Yeon Cho, Dong-Gun Lee, Chulmin Park, Raeseok Lee

**\*Corresponding author: Raeseok Lee, MD, MPH, PhD**

Division of Infectious Diseases, Department of Internal Medicine, Seoul St. Mary's Hospital, College of Medicine, The Catholic University of Korea, 222, Banpo-daero, Seocho-gu, Seoul, 06591, Republic of Korea

Tel: +82-2-2258-6751, Fax: +82-2-785-7944, E-mail: misozium03@catholic.ac.kr

ORCID: 0000-0002-1168-3666

## **Table of contents:**

|                                                                                                                                                                                          |   |
|------------------------------------------------------------------------------------------------------------------------------------------------------------------------------------------|---|
| <b>Supplementary Table 1.</b> Geographic distribution and number of distinct sequence types of <i>Aspergillus fumigatus</i> isolates.....                                                | 3 |
| <b>Supplementary Table 2.</b> Geographic and genotypic distribution of <i>cyp51A</i> tandem-repeat mutations among azole-resistant <i>Aspergillus fumigatus</i> isolates.....            | 4 |
| <b>Supplementary Fig. 1</b> Minimum spanning tree of 498 <i>Aspergillus fumigatus</i> isolates, color-coded by source of isolation .....                                                 | 5 |
| <b>Supplementary Fig. 2</b> Minimum spanning tree of 498 <i>Aspergillus fumigatus</i> isolates highlighting <i>cyp51A</i> tandem-repeat mutations associated with azole resistance. .... | 6 |

**Supplementary Table 1.** Geographic distribution and number of distinct sequence types (STs) of

*Aspergillus fumigatus* isolates

| Location       | Isolates count | Number of distinct STs |
|----------------|----------------|------------------------|
| Australia      | 2              | 2                      |
| Austria        | 2              | 2                      |
| Brazil         | 1              | 1                      |
| Canada         | 2              | 2                      |
| China          | 43             | 9                      |
| France         | 10             | 8                      |
| Germany        | 256            | 176                    |
| Japan          | 1              | 1 <sup>a</sup>         |
| Korea          | 155            | 131                    |
| Netherlands    | 1              | 1                      |
| New Zealand    | 2              | 2                      |
| Peru           | 1              | 1                      |
| Russia         | 1              | 1                      |
| Space          | 2              | 2 <sup>b</sup>         |
| Spain          | 5              | 5                      |
| United Kingdom | 7              | 6                      |
| USA            | 7              | 6                      |
| <b>Total</b>   | 498            | 356(343) <sup>c</sup>  |

<sup>a</sup> JCM 10253 is registered in Japan (NCBI), but was originally isolated from a human lung in the USA

(listed as “animal” in the database).

<sup>b</sup> Strains IF1SW-F4 and ISSFT-021 were isolated from the International Space Station; isolation and analysis were conducted by NASA.

<sup>c</sup> Aggregating ST types by country yields 356 STs; however, 13 STs are shared between countries, resulting in a total of 343 distinct STs.

**Supplementary Table 2.** Geographic and genotypic distribution of *cyp51A* tandem-repeat mutations among azole-resistant *Aspergillus fumigatus* isolates.

| Strain              | ST  | Genotype              | Location | Collection    | Date       | Azole resistance |
|---------------------|-----|-----------------------|----------|---------------|------------|------------------|
| <b>F214</b>         | 102 | 10-2-3-5-1-4-2-4-4-2  | Korea    | Clinical      | 2020-07-24 | TR34             |
| <b>F623</b>         | 106 | 10-2-3-5-2-5-3-11-7-3 | Korea    | Clinical      | 2022-03-08 | TR34             |
| <b>F669</b>         | 109 | 10-2-3-7-3-4-2-8-3-3  | Korea    | Clinical      | 2022-06-28 | TR46             |
| <b>F430</b>         | 117 | 10-4-3-5-2-5-4-11-3-3 | Korea    | Clinical      | 2021-07-15 | TR34             |
| <b>F461</b>         | 123 | 10-6-3-7-3-4-2-7-3-3  | Korea    | Clinical      | 2021-08-16 | TR46             |
| <b>F296</b>         | 128 | 11-2-5-5-1-4-3-12-4-3 | Korea    | Clinical      | 2020-12-18 | TR34             |
| <b>NRZ-2017-381</b> | 132 | 10-2-3-6-1-3-2-9-2-1  | Germany  | Clinical      | 2017-01-01 | TR34             |
| <b>NRZ-2017-214</b> | 133 | 8-2-3-3-3-3-2-10-3-2  | Germany  | Clinical      | 2017-01-01 | TR46             |
| <b>NRZ-2018-529</b> | 152 | 7-5-3-5-3-5-2-9-4-2   | Germany  | Clinical      | 2018-01-01 | TR34             |
| <b>NRZ-2017-362</b> | 155 | 8-6-3-3-3-3-2-6-3-2   | Germany  | Clinical      | 2017-01-01 | TR34             |
| <b>NRZ-2018-539</b> | 266 | 7-5-3-5-3-5-2-9-4-2   | Germany  | Clinical      | 2018-01-01 | TR46             |
| <b>NRZ-2018-290</b> | 280 | 8-3-3-6-1-3-2-9-3-2   | Germany  | Clinical      | 2018-01-01 | TR34             |
| <b>CNM-CM8714</b>   | 290 | 8-2-3-5-1-4-2-6-4-2   | Spain    | Clinical      |            | TR34             |
| <b>C-1-67s-1</b>    | 303 | 12-3-3-5-3-0-2-9-3-1  | Germany  | Environmental | 2016-07-05 | TR34             |
| <b>I-1-12-1</b>     | 303 | 12-2-3-5-3-3-3-5-3-1  | Germany  | Environmental | 2016-05-20 | TR34             |
| <b>NRZ-2016-121</b> | 303 | 12-4-4-6-1-0-2-11-3-1 | Germany  | Clinical      | 2016-01-01 | TR34             |
| <b>C-1-6s-2</b>     | 319 | 9-6-3-5-3-3-3-2-3-1   | Germany  | Environmental | 2016-04-08 | TR34             |
| <b>A-3-46s-1</b>    | 322 | 8-5-3-5-3-3-5-6-4-2   | Germany  | Environmental | 2016-07-13 | TR34             |
| <b>NRZ-2014-065</b> | 337 | 8-9-3-3-3-3-3-9-3-2   | Germany  | Clinical      | 2014-01-01 | TR46             |
| <b>CNM-CM8057</b>   | 339 | 8-2-3-6-1-4-2-6-3-2   | Spain    | Clinical      |            | TR46             |
| <b>E-1-48-2</b>     | 341 | 8-4-3-6-1-5-3-6-1-2   | Germany  | Environmental | 2016-04-12 | TR34             |

**Abbreviations:** MLVA, multilocus variable-number tandem-repeat analysis; ST, sequence type; TR, tandem-repeat.

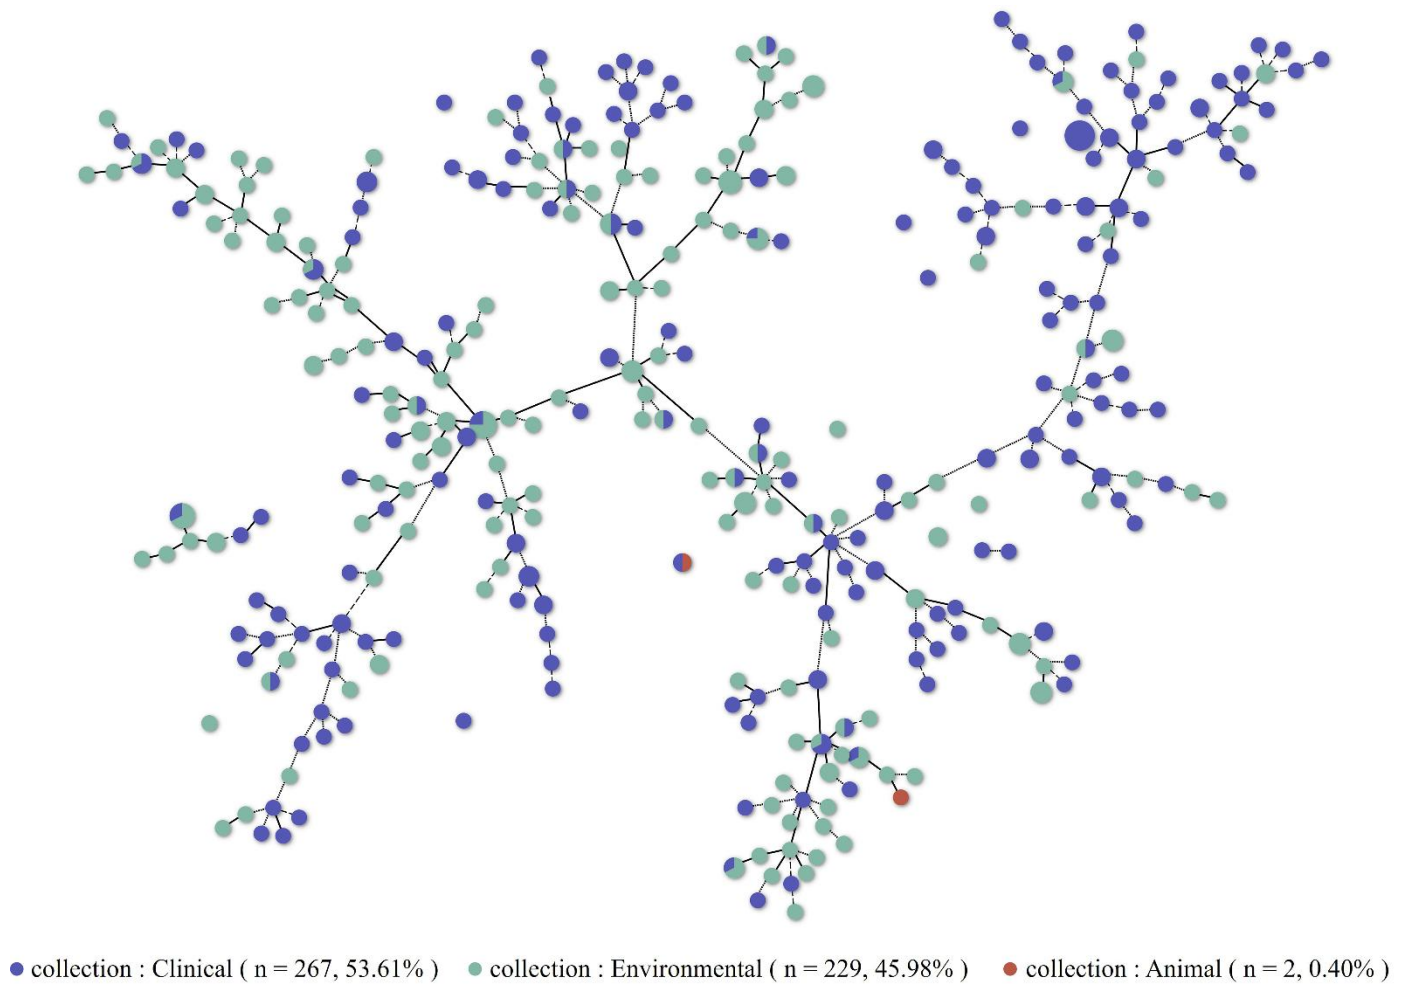

**Supplementary Fig. 1** Minimum spanning tree (MST) of 498 *Aspergillus fumigatus* isolates, color-coded by source of isolation

The MST was generated based on multilocus variable-number tandem-repeat profiles. Each node represents a unique sequence type, with node size proportional to the number of isolates. Nodes are colored by source: clinical (blue), environmental (green), and animal (red). Isolates from different sources were broadly intermixed across all clusters, with no evidence of source-specific segregation.

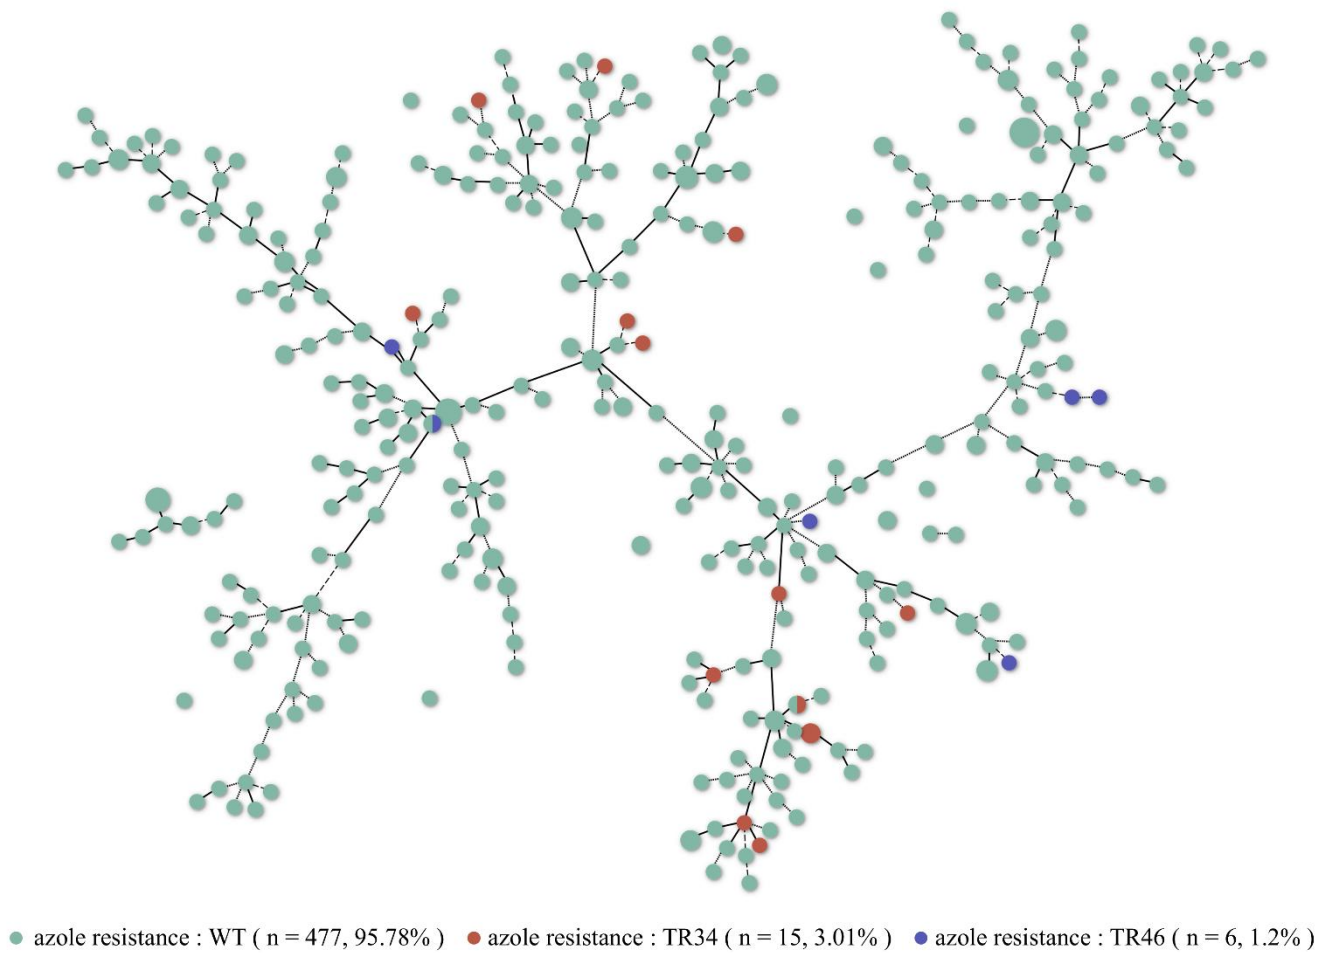

**Supplementary Fig. 2** Minimum spanning tree (MST) of 498 *Aspergillus fumigatus* isolates highlighting *cyp51A* tandem-repeat (TR) mutations associated with azole resistance

The MST was constructed from multilocus variable-number tandem-repeat profiles. Each node represents a unique sequence type (ST), with size proportional to the number of isolates. Nodes are colored by *cyp51A* genotype: wild-type (green), TR34 (red), and TR46 (blue). Among 18 resistance-associated STs, 13 (72%) clustered within Cluster 3 (predominantly European), while the remaining STs were located in Clusters 1 and 4 (East Asian origin), indicating regional aggregation of resistance genotypes.
